# Supplementary material for: miR-140-5p regulates adipocyte differentiation by targeting transforming growth factor-β signaling
Source: PubMed Central journal article supplement (PMC4676041; doi:10.1038/srep18118), 2015-12-11
Supplement: srep18118-s1.pdf [file srep18118-s1.pdf]

---

## Supplementary Information

### **miR-140-5p regulates adipocyte differentiation by targeting transforming growth factor- $\beta$ signaling**

Xin Zhang<sup>1§</sup>, Ailing Chang<sup>2§</sup>, Yongmei Li<sup>1</sup>, Yifei Gao<sup>1</sup>,  
Haixiao Wang<sup>3</sup>, Zhongshu Ma<sup>2</sup>, Xiaoxia Li<sup>4</sup>, Baoli Wang<sup>1\*</sup>

<sup>1</sup> Collaborative Innovation Center of Tianjin Metabolic Diseases Hospital, Key Laboratory of Hormones and Development (Ministry of Health), Metabolic Diseases Hospital & Institute of Endocrinology, Tianjin Medical University, Tianjin 300070, China

<sup>2</sup> Division of Endocrinology, Tianjin Medical University General Hospital, Tianjin 300052, China

<sup>3</sup> School of Integrative Medicine, Tianjin Traditional Medical University, Tianjin 300193, China

<sup>4</sup> College of Basic Medical Sciences, Tianjin Medical University, Tianjin 300070, China

<sup>§</sup>These authors contributed equally to the work.

**\*Correspondence author:** Baoli Wang, MD, PhD. E-mail: blwang@tmu.edu.cn. Tel: 86-22-23542730, Fax: 86-22-23528460

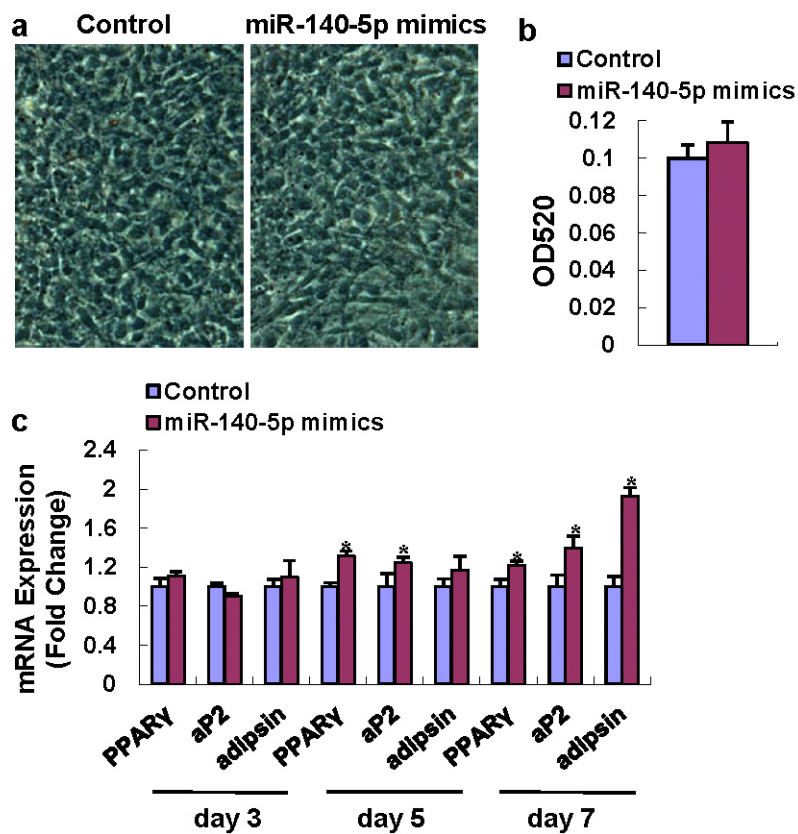

**Figure S1. miR-140-5p mimics did not induce adipocyte formation in absence of adipogenic treatment.** miR-140-5p mimics transfection did not obviously induce adipocyte formation from ST2 in absence of AIM. Oil-Red O extracted with isopropanol was measured at OD520 (a, b). The mRNA levels of PPAR $\gamma$ , aP2 and adipsin were slightly induced at some indicated time points after transfection (c). \*Significant vs. negative control,  $p < 0.05$ .

---

**Table 1 The primers used for RT-PCR quantifications of adipogenic and osteogenic genes**

| Genes          | Forward primer sequences      | Reverse primer sequences      |
|----------------|-------------------------------|-------------------------------|
| PPAR $\gamma$  | 5'-CTTGACAGGAAAGACAACGG-3'    | 5'-GCTTCTACGGATCGAAACTG-3'    |
| C/EBP $\alpha$ | 5'-CTGATTCTTGCCAAACTGAG-3'    | 5'-GAGGAAGCTAAGACCCACTAC-3'   |
| aP2            | 5'-AAATCACCGCAGACGACAGG-3'    | 5'-GGCTCATGCCCTTTCATAAAC-3'   |
| adipsin        | 5'-TGATGTGTGCAGAGAGCAAC-3'    | 5'-CGTAACCACACCTTCGACTG-3'    |
| Runx2          | 5'-TCCTGTAGATCCGAGCACCA-3'    | 5'-CTGCTGCTGTTGTTGCTGTT-3'    |
| Alp            | 5'-CCAGAAAGACACCTTGACTGTGG-3' | 5'-TCTTGTCCGTGTCGCTCACCAT-3'  |
| Opn            | 5'-GCTTGGCTTATGGACTGAGGTC-3'  | 5'-CCTTAGACTCACCGCTCTTCATG-3' |
| Col1a1         | 5'-CCTCAGGGTATTGCTGGACAAC-3'  | 5'-CAGAAGGACCTTGTTTGCCAGG-3'  |
| $\beta$ -actin | 5'-AAGACCTCTATGCCAACACAG-3'   | 5'-GGAGGAGCAATGATCTTGATC-3'   |

---

---

**Table 2 The primers used for 3'-UTR and promoter amplifications**

---

| Genes                   | Forward primer sequences          | Reverse primer sequences           |
|-------------------------|-----------------------------------|------------------------------------|
| Tgfbr1                  | 5'-AGAATTCTTGCAGCAGTGGAATATGG-3'  | 5'-AGATATCTTCCTTCGGCAATAGACAAG-3'  |
| Wnt11                   | 5'-AGAATTCGCTTCAAAGGAAACTGATAG-3' | 5'-AGATATCACAGATCACATACAGGGAAAC-3' |
| Ostm1(conserved)        | 5'-AGAGCTCTTAGTCACTGGGAGCCCACT-3' | 5'-AAAGCTTCTGGCATAAGATGAATCCATC-3' |
| Ostm1(poorly conserved) | 5'-AGAGCTCAGGAAGGCAGGAGTGTTTGG-3' | 5'-GAACGCGTGCCTCAGGATTCAGAAC-3'    |
| miR-140-5p promoter     | 5'-AGGTACCAGAACAAGGCTAAGCAAAGG-3' | 5'-CAAGCTTATGAAATCATTCCCACAAGC-3'  |

---
